# Supplementary material for: External quality assessment of SARS-CoV-2 serology in European expert laboratories, April 2021
Source: PubMed Central journal article supplement (PMC9585882; doi:10.2807/1560-7917.es.2022.27.42.2101057), 2022-10-20
Supplement: 21-01057_REUSKEN_Supplement.pdf [file 21-01057_REUSKEN_Supplement.pdf]

[Supplemental material - EQA Panel characteristics and assays performed by the participating laboratories](#)

This supplementary material is hosted by Eurosurveillance as supporting information alongside the article 'External Quality Assessment of SARS-CoV-2 serology in European Expert Laboratories: April 2021', on behalf of the authors, who remain responsible for the accuracy and appropriateness of the content. The same standards for ethics, copyright, attributions and permissions as for the article apply. Supplements are not edited by Eurosurveillance and the journal is not responsible for the maintenance of any links or email addresses provided therein.

**Table S1.** Tests and outcomes of pre-distribution panel characterisation of EQA panels by WHO COVID-19 reference laboratories, INMI and RIVM.

| WHO COVID-19 reference laboratory | Type of test | Type of antibody        | Test information                                               | Unit                     | cut-off value | A -          | D -          | H -          | B - mild | G - mild | C - negative | F - negative | E -                     |
|-----------------------------------|--------------|-------------------------|----------------------------------------------------------------|--------------------------|---------------|--------------|--------------|--------------|----------|----------|--------------|--------------|-------------------------|
|                                   |              |                         |                                                                |                          |               | hospitalised | hospitalised | hospitalised | A+/G+/M+ | A+/G+/M+ | A+/G+/M+     | A+/G+/M+     | A+/G+/M+ <sup>low</sup> |
| INMI                              | ELISA        | IgA                     | DIESSE Diagnostica Senese Spa - ENZY-WELL SARS-CoV-2 IgA       | ratio                    | ≥1.1          | 9.6          | 3.4          | 4            | 4.8      | 7.2      | 0.6          | 0.6          | 1.4                     |
|                                   | ELISA        | IgM                     | DIESSE Diagnostica Senese Spa - ENZY-WELL SARS-CoV-2 IgM       | ratio                    | ≥1.1          | 2.5          | 3.2          | 1.2          | 3.4      | 0.6      | 0.3          | 0.4          | 0.5                     |
|                                   | ELISA        | IgG                     | DIESSE Diagnostica Senese Spa - ENZY-WELL SARS-CoV-2 IgG       | ratio                    | ≥1.1          | 7.1          | 8.1          | 7.6          | 9.6      | 5.2      | 0.5          | 0.3          | 1                       |
|                                   | CLIA         | IgG                     | Diasorin Inc. - LIAISON SARS-CoV-2 S1/S2 IgG                   | AU/ml                    | ≥14           | 122          | 125          | 182          | 114      | 108      | 7.71         | 8.99         | 24.7                    |
|                                   | CMIA         | IgM                     | Abbott - SARS-CoV-2 IgG II Quant                               | AU/ml                    | ≥50           | 7215.4       | 13166.8      | 5215.7       | 4844     | 2837.9   | 13.9         | 6.9          | 14.6                    |
|                                   | CMIA         | IgG                     | Abbott - SARS-CoV-2 anti-N IgG (CMIA)                          | ratio                    | ≥1.4          | 5.46         | 7.43         | 5.97         | 6.68     | 4.48     | 0.23         | 0.37         | 0.63                    |
|                                   | VNT90        | neutralising antibodies | in-house - virus microneutralisation (VNT90)                   | titer                    | ≥10           | 320          | 160          | 80           | >640     | 40       | <10          | <10          | <10                     |
| RIVM                              | ELISA        | Total Ig                | Beijing Wantai Biological - SARS-CoV-2 Ab ELISA                | ratio                    | ≥1            | 22.47        | 25.34        | 23.02        | 21.01    | 31.36    | 0.01         | 0.01         | 0.01                    |
|                                   | ELISA        | IgM                     | Beijing Wantai Biological - SARS-CoV-2 IgM ELISA               | ratio                    | ≥1            | 21.31        | 9.29         | 6.53         | 26.50    | 2.30     | 0.09         | 0.43         | 0.00                    |
|                                   | ELISA        | IgA                     | Euroimmun - Anti-SARS-CoV-2 ELISA IgA                          | ratio                    | ≥1.1          | 11.10        | 10.12        | 10.42        | 11.33    | 8.85     | 0.44         | 0.64         | 0.46                    |
|                                   | ELISA        | IgG                     | Euroimmun - Anti-SARS-CoV-2 ELISA IgG                          | ratio                    | ≥1.1          | 8.10         | 7.86         | 8.64         | 7.38     | 7.21     | 0.27         | 0.69         | 0.14                    |
|                                   | sVNT         | neutralising antibodies | GenScript - SARS-CoV-2 Surrogate Virus Neutralisation Test Kit | Percentage of inhibition | 30.0          | 99.99        | 99.99        | 100.00       | 99.99    | 100.00   | 5.18         | 0.81         | 5.59                    |

**Table S1 Continued.** Tests and outcomes of pre-distribution panel characterisation of EQA panels by WHO COVID-19 reference laboratories, INMI and RIVM.

| WHO COVID-19 reference laboratory | Type of test | Type of antibody        | Test information                              | Unit  | cut-off value | A -                      | D -                      | H -                      | B - mild | G - mild    | C - negative | F - negative | E -                     |
|-----------------------------------|--------------|-------------------------|-----------------------------------------------|-------|---------------|--------------------------|--------------------------|--------------------------|----------|-------------|--------------|--------------|-------------------------|
|                                   |              |                         |                                               |       |               | hospitalised<br>A+/G+/M+ | hospitalised<br>A+/G+/M+ | hospitalised<br>A+/G+/M+ | A+/G+/M+ | A+/G+/M+low | pre-pandemic | pre-pandemic | acute EBV/CMV infection |
|                                   | VNT50        | neutralising antibodies | in-house - virus microneutralisation (VNT50)  | titer | ≥10           | >640                     | 400                      | 480                      | >640     | 140         | <10          | <10          | <10                     |
|                                   | Micro-array  | IgG                     | in-house - protein micro-array SARS-CoV-2-S-T | titer | ≥10           | >14580                   | 8800                     | 5016                     | 6908     | 2754        | 10           | 10           | 10                      |
|                                   |              |                         | in-house - protein micro-array SARS-CoV-2-S1  | titer | ≥10           | 3470                     | 2330                     | 2398                     | 1808     | 1397        | 25           | 51           | 10                      |
|                                   |              |                         | in-house - protein micro-array SARS-CoV-2-N   | titer | ≥10           | 10206                    | 3532                     | 4006                     | >14580   | 276         | 10           | 40           | 10                      |
|                                   |              |                         | in-house - protein micro-array 229E-S-T       | titer | ≥10           | 1603                     | 862                      | 816                      | 1382     | 1460        | 1227         | 1005         | 768                     |
|                                   |              |                         | in-house - protein micro-array HKU1-S-T       | titer | ≥10           | 9775                     | 4202                     | 4198                     | 5271     | 1716        | 570          | 487          | 547                     |
|                                   |              |                         | in-house - protein micro-array HKU1-S1        | titer | ≥10           | 874                      | 458                      | 457                      | 356      | 490         | 572          | 479          | 405                     |
|                                   |              |                         | in-house - protein micro-array OC43-S-T       | titer | ≥10           | 7101                     | 6496                     | 3783                     | 3740     | 1786        | 1272         | 1019         | 730                     |
|                                   |              |                         | in-house - protein micro-array OC43-S1        | titer | ≥10           | 656                      | 2114                     | 468                      | 778      | 888         | 1408         | 1278         | 1016                    |
|                                   |              |                         | in-house - protein micro-array NL63-S-T       | titer | ≥10           | 2302                     | 1640                     | 1597                     | 1753     | 1823        | 1264         | 1075         | 1247                    |
|                                   |              |                         | in-house - protein micro-array NL63-S1        | titer | ≥10           | 387                      | 418                      | 195                      | 339      | 395         | 514          | 508          | 504                     |

**Table S2.** Commercial and in-house tests assessed by EQA participants.

| Type of test | Test # | Test information                                                          | No. laboratories |
|--------------|--------|---------------------------------------------------------------------------|------------------|
| commercial   | 1      | Abbott - SARS-CoV- IgM (CMIA)                                             | 6                |
| commercial   | 2      | Abbott - SARS-CoV-2 IgG (CMIA)                                            | 12               |
| commercial   | 3      | Abbott - SARS-CoV-2 IgG II Quant                                          | 9                |
| commercial   | 4      | AESKU Diagnostics - AESKULISA SARS-CoV-2 S1 IgG                           | 1                |
| commercial   | 5      | AESKU Diagnostics - AESKULISA SARS-CoV-2 S1 IgM                           | 1                |
| commercial   | 6      | AMP diagnostics - AMP Rapid Test SARS-CoV-2 IgG/IgM                       | 1                |
| commercial   | 7      | AAZ - COVID-PRESTO TROD IgG/IgM                                           | 1                |
| commercial   | 8      | Beckman Coulter - Access SARS-CoV-2 IgG II Assay                          | 1                |
| commercial   | 9      | Beijing Wantai Biological - SARS-CoV-2 Ab ELISA                           | 10               |
| commercial   | 10     | Beijing Wantai Biological - SARS-CoV-2 IgM ELISA                          | 3                |
| commercial   | 11     | BioMerieux - VIDAS SARS-COV-2 IgG                                         | 2                |
| commercial   | 12     | BioMerieux - VIDAS SARS-COV-2 IgM                                         | 2                |
| commercial   | 13     | Diasorin Inc. - LIAISON SARS-CoV-2 S1/S2 IgG                              | 5                |
| commercial   | 14     | Diasorin Inc. - LIAISON SARS-CoV-2 TrimericS IgG                          | 2                |
| commercial   | 15     | Diasorin Inc. - LIAISON SARS-CoV-2 IgM                                    | 1                |
| commercial   | 16     | Euroimmun - Anti-SARS-CoV-2 ELISA IgA                                     | 14               |
| commercial   | 17     | Euroimmun - Anti-SARS-CoV-2 ELISA IgG                                     | 17               |
| commercial   | 18     | Euroimmun - Anti-SARS-CoV-2 NCP ELISA IgG                                 | 3                |
| commercial   | 19     | Euroimmun - Anti-SARS-CoV-2 NCP ELISA IgM                                 | 5                |
| commercial   | 20     | Euroimmun - Anti-SARS-CoV-2 QuantiVac ELISA IgG                           | 4                |
| commercial   | 21     | Eurospital Diagnostic - ELISA SARS CoV-2 IgG                              | 1                |
| commercial   | 22     | Generic assays - ELISA, GA CoV-2 IgG                                      | 1                |
| commercial   | 23     | Generic assays - ELISA, GA CoV-2 IgM                                      | 1                |
| commercial   | 24     | GenScript - cPass SARS CoV-2 Neutralisation Antibody Detection Kit        | 3                |
| commercial   | 25     | GenScript - SARS-CoV-2 Surrogate Virus Neutralisation Test Kit            | 5                |
| commercial   | 26     | Hangzhou Biotest Biotech - RightSign COVID-19 IgG/IgM Rapid Test Cassette | 1                |

**Table S2 continued.** Commercial and in-house tests assessed by EQA participants.

| Type of test | Test # | Test information                                              | No. laboratories                                  |
|--------------|--------|---------------------------------------------------------------|---------------------------------------------------|
| commercial   | 27     | ImmunoDiagnostics - SARS-CoV-2 NP IgG ELISA Kit               | 1                                                 |
| commercial   | 28     | ImmunoDiagnostics - SARS-CoV-2 S1 IgG ELISA Kit               | 1                                                 |
| commercial   | 29     | Maccura Biotechnology - SARS-CoV-2 IgM/IgG                    | 1                                                 |
| commercial   | 30     | Roche - Elecsys Anti-SARS-CoV-2                               | 2                                                 |
| commercial   | 31     | Roche - Elecsys Anti-SARS-CoV-2 S                             | 3                                                 |
| commercial   | 32     | Seramun Diagnostica GmbH - SeraSpot Anti-SARS-CoV-2 IgA       | 1                                                 |
| commercial   | 33     | Seramun Diagnostica GmbH - SeraSpot Anti-SARS-CoV-2 IgG       | 1                                                 |
| commercial   | 34     | Serion diagnostics - Serion Elisa agile SARS-CoV-2 IgA        | 1                                                 |
| commercial   | 35     | Serion diagnostics - Serion Elisa agile SARS-CoV-2 IgG        | 1                                                 |
| commercial   | 36     | Siemens - Atellica IM Analyzer - SARS-CoV-2 IgG (sCOVG)       | 1                                                 |
| commercial   | 37     | TestLine Clinical Diagnostics - EIA COVID-19 RBD IgG          | 1                                                 |
| commercial   | 38     | Vircell microbiologists - COVID-19 ELISA IgG                  | 2                                                 |
| commercial   | 39     | Vircell microbiologists - COVID-19 ELISA IgM+IgA              | 3                                                 |
| commercial   | 40     | Vircell microbiologists - COVID-19 VIRCLIA IgG                | 1                                                 |
| commercial   | 41     | Zhejiang Orient Gene Biotech Co - COVID-19 IgG/IgM Rapid Test | 1                                                 |
| In-house     | 42     | ELISA                                                         | 2                                                 |
| In-house     | 43     | ELISA SARS-CoV-2 IgG                                          | 1                                                 |
| In-house     | 44     | ELISA SARS-CoV-2 IgM                                          | 1                                                 |
| In-house     | 45     | IFA                                                           | 1                                                 |
| In-house     | 46     | L3 based NT assay                                             | 1                                                 |
| In-house     | 47     | Luminex multiplex immunoassay                                 | 1 laboratory (3 different variations of the test) |
| In-house     | 48     | Protein micro-array                                           | 1                                                 |
| In-house     | 49     | PRNT                                                          | 4                                                 |
| In-house     | 50     | Pseudo-neutralisation assay                                   | 1                                                 |
| In-house     | 51     | surrogate VNT                                                 | 1                                                 |
| In-house     | 52     | suspension immunoassay based on S1 including RBD              | 1                                                 |
| In-house     | 53     | virus microneutralisation                                     | 12                                                |
